# Supplementary material for: Climate change could overturn bird migration: Transarctic flights and high-latitude residency in a sea ice free Arctic
Source: PubMed Central journal article supplement (PMC6883031; doi:10.1038/s41598-019-54228-5), 2019-11-28

**Climate change could overturn bird migration:  
Transarctic flights and high-latitude residency in a sea ice free Arctic**

**Manon Clairbaux<sup>1\*</sup>, Jérôme Fort<sup>2</sup>, Paul Mathewson<sup>3</sup>, Warren Porter<sup>3</sup>, Hallvard Strøm<sup>4</sup>,  
David Grémillet<sup>1,5</sup>**

<sup>1</sup>CEFE UMR 5175, CNRS – Université de Montpellier – Université Paul-Valéry Montpellier – EPHE, Montpellier, France

<sup>2</sup>Littoral Environnement et Sociétés (LIENSs), UMR 7266 CNRS-Université de La Rochelle, La Rochelle, France

<sup>3</sup>Department of Integrative Biology, University of Wisconsin, Madison, WI, USA

<sup>4</sup>Norwegian Polar Institute, Fram Centre, P.O. Box 6606 Langnes, 9296 Tromsø, Norway

<sup>5</sup>Percy FitzPatrick Institute, DST/NRF Centre of Excellence, University of Cape Town, Rondebosch, South Africa

\* Corresponding author, [manon.clairbaux@cefe.cnrs.fr](mailto:manon.clairbaux@cefe.cnrs.fr) or 04.67.61.33.09 (FRANCE)

## Supplemental materials I: Current potential distribution of little auks (*Alle alle*) and occurrence data points

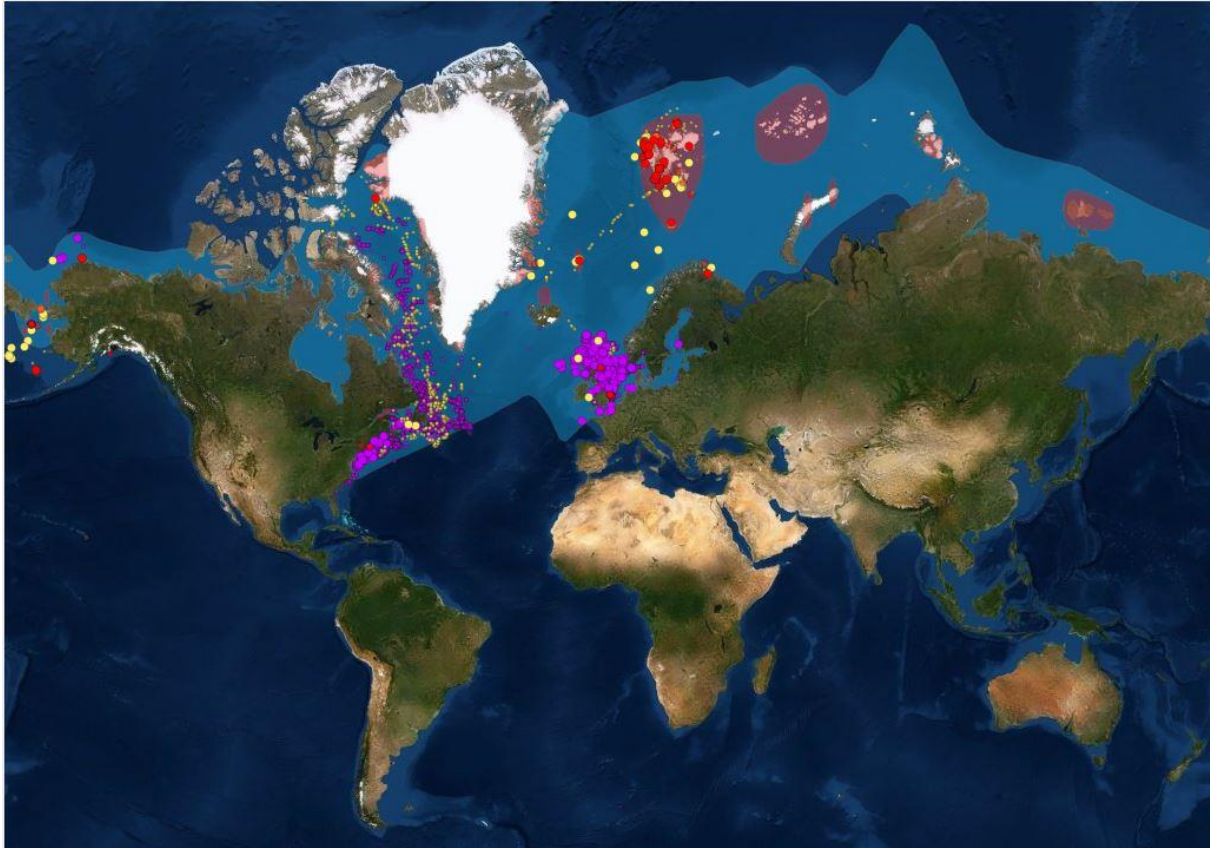

This map has been created using ESRI ArcGis Online with satellite imagery from EarthStar Geographics. Sources: Esri, DigitalGlobe, Earthstar Geographics, CNES/Airbus DS, GeoEye, USDA FSA, USGS, Getmapping, AeroGrid, IGN, IGP, and the GIS User Community.

The current potential distribution of little auks was digitalized by the GROMS (Global Register of Migratory Species) from “Handbook of the Birds of the World. Vol.3 Hoatzin to Auks” by del Hoyo, Elliot and Sargatal (1996). Red patches are areas potentially used by Little auks during breeding and the blue region is potentially used during foraging or wintering.

Red, yellow and purple dots are the occurrence data points available respectively for breeding periods, foraging during summer and wintering periods. Larger dots are those used while modelling current little auks distribution. Smaller dots represent positions which were excluded from the analysis because some associated environmental variables were lacking.

## Supplemental materials II: Summary of parameters used in Niche Mapper™

| <b>Morphological properties</b>                                                                  | <b>Value</b>                                                                                       | <b>References</b>                                                                                  |
|--------------------------------------------------------------------------------------------------|----------------------------------------------------------------------------------------------------|----------------------------------------------------------------------------------------------------|
| Body mass (g)                                                                                    | 202                                                                                                | Stempniewicz et al., 2016                                                                          |
| Body plumage depth (dorsal-ventral) (mm)                                                         | 7.4-12.8                                                                                           | Fort et al., 2009                                                                                  |
| Head plumage depth (d-v) (mm)                                                                    | 5.2-9.4                                                                                            | Amélineau et al., 2018                                                                             |
| Plumage reflectivity (d-v) (%)                                                                   | 40.4-65.0                                                                                          | Fort et al., 2009                                                                                  |
| Body feather length (d-v) (mm)                                                                   | 20.0-19.2                                                                                          | Fort et al., 2009                                                                                  |
| Head feather length (d-v) (mm)                                                                   | 11.6-10.7                                                                                          | Amélineau et al., 2018                                                                             |
| Feather diameter (d-v) (µm)                                                                      | 33.0-33.0                                                                                          | Fort et al., 2009                                                                                  |
| <b>Physiological properties</b>                                                                  |                                                                                                    |                                                                                                    |
| Body core temperature (°C)                                                                       | 40                                                                                                 | Gabrielsen et al., 1991                                                                            |
| Flesh thermal conductivity (W.m <sup>-1</sup> .°C <sup>-1</sup> )                                | 0.4-2.8                                                                                            | Cheng & Plewes, 1992                                                                               |
| Oxygen extraction efficiency (%)                                                                 | 35                                                                                                 | Arens & Cooper, 2005                                                                               |
| Bird density (kg.m <sup>-3</sup> )                                                               | 932.9                                                                                              | Porter et al., 2006                                                                                |
| Resting metabolic rate (W)                                                                       | 2.02                                                                                               | Gabrielsen et al., 1991                                                                            |
| Flight metabolism (W)                                                                            | 12.9                                                                                               | Raveling & LeFebvre, 1967                                                                          |
| Diving metabolism (W)                                                                            | 2.5*Resting metabolic rate                                                                         | Croll & McLaren, 1993                                                                              |
| <b>Behavioural properties</b>                                                                    |                                                                                                    |                                                                                                    |
| Ventral area contacting substrate (%)                                                            | 25                                                                                                 | Fort et al., 2009                                                                                  |
| Proportion of time spent flying per day during winter (%)                                        | 9                                                                                                  | Fort et al., 2009,2010                                                                             |
| Proportion of time spent flying per day during migratory flight (%) according migratory strategy | $\frac{\text{Distance between colony and wintering site} * 100}{\text{Flight speed} * 86400 * 30}$ | This study                                                                                         |
| Proportion of time spent diving per day (%)                                                      | 24                                                                                                 | Fort et al.,2010                                                                                   |
| <b>Environmental data</b>                                                                        |                                                                                                    |                                                                                                    |
| Sea surface temperature (°C)                                                                     |                                                                                                    | Climatic models previously used according time period (2000-2017 or 2050-2059) and RCP8.5 scenario |
| Air temperature (°C)                                                                             |                                                                                                    |                                                                                                    |
| Cloud over (%)                                                                                   | 0-100                                                                                              |                                                                                                    |
| Relative humidity (%)                                                                            |                                                                                                    |                                                                                                    |
| Wind speed (m.s <sup>-1</sup> )                                                                  |                                                                                                    |                                                                                                    |

Little auk is modelled by several ellipsoids (head, body and legs) as a multipart animal (Amélineau et al., 2018) in the animal module of Niche Mapper™. When not diving or flying, little auk is modelled as resting at the surface of water, with 25 % of its body in contact with water: the model targeted the resting metabolic rate for all hours except for the scheduled diving and flight hours.

**Supplemental materials III: List of migratory/partial migratory species to which the Arctic region represents more than 5% of their breeding range.**

Families, Latin names and code for winter's habitats are those used in CAFF's technical report (Scott, 1998).

Code for winter's habitats:

**PE: Pelagic (Open Ocean)**

CM: Coastal marine habitats (inshore marine waters)

CW: Coastal wetlands (mudflats, sandy beaches, rocky shores, mangroves)

IW: Freshwater and blackish wetlands, including deep water lakes

OC: Open country habitats

GR: Grasslands, steppe and arable land

DE: Desert habitats

DF: Temperate forests and woodland (coniferous and deciduous)

TF: Tropical forests (lowland and montane)

TW: Tropical woodland (acacia woodland, parkland, scrub)

| <b>Families</b>          | <b>Common names</b>             | <b>Latin names</b>               | <b>Wintering habitat</b> |
|--------------------------|---------------------------------|----------------------------------|--------------------------|
| <b>Gaviidae</b>          | Red-throated diver              | <i>Gavia stellata</i>            | CM                       |
|                          | Black-throated diver            | <i>Gavia arctica</i>             | CM                       |
|                          | Pacific loon                    | <i>Gavia pacifica</i>            | CM                       |
|                          | Great northern diver            | <i>Gavia immer</i>               | CM                       |
|                          | White billed diver              | <i>Gavia adamsii</i>             | CM                       |
| <b>Podicipedidae</b>     | Red-necked grebe                | <i>Podiceps grisegena</i>        | CM                       |
|                          | Horned grebe                    | <i>Podiceps auritus</i>          | CM                       |
| <b>Procellariidae</b>    | <b>Northern fulmar</b>          | <i>Fulmarus glacialis</i>        | <b>PE</b>                |
|                          | <b>Manx shearwater</b>          | <i>Puffinus puffinus</i>         | <b>PE</b>                |
| <b>Hydrobatidae</b>      | <b>European storm petrel</b>    | <i>Hydrobates pelagicus</i>      | <b>PE</b>                |
|                          | <b>Leach's storm-petrel</b>     | <i>Oceanodroma leucorhoa</i>     | <b>PE</b>                |
|                          | <b>Fork-tailed storm-petrel</b> | <i>Oceanodroma furcata</i>       | <b>PE</b>                |
| <b>Sulidae</b>           | <b>Northern gannet</b>          | <i>Morus bassanus</i>            | <b>PE</b>                |
| <b>Phalacrocoracidae</b> | Double-crested cormorant        | <i>Phalacrocorax auritus</i>     | CM                       |
|                          | Great cormorant                 | <i>Phalacrocorax carbo</i>       | CM                       |
|                          | Red-faced cormorant             | <i>Phalacrocorax urile</i>       | CM                       |
|                          | Pelagic cormorant               | <i>Phalacrocorax pelagicus</i>   | CM                       |
|                          | European shag                   | <i>Phalacrocorax aristotelis</i> | CM                       |

|                 |                             |                                  |    |
|-----------------|-----------------------------|----------------------------------|----|
| <b>Anatidae</b> | Whooper swan                | <i>Cygnus cygnus</i>             | IW |
|                 | Tundra swan                 | <i>Cygnus columbianus</i>        | IW |
|                 | Pink-footed goose           | <i>Anser brachyrhynchus</i>      | GR |
|                 | Taiga bean goose            | <i>Anser fabalis</i>             | GR |
|                 | Greater white-fronted goose | <i>Anser albifrons</i>           | GR |
|                 | Lesser white-fronted goose  | <i>Anser erythropus</i>          | GR |
|                 | Greylag goose               | <i>Anser anser</i>               | GR |
|                 | Snow goose                  | <i>Anser caerulescens</i>        | GR |
|                 | Ross goose                  | <i>Anser rossii</i>              | GR |
|                 | Emperor goose               | <i>Anser canagica</i>            | CW |
|                 | Canada goose                | <i>Branta canadensis</i>         | GR |
|                 | Barnacle goose              | <i>Branta leucopsis</i>          | GR |
|                 | Brent goose                 | <i>Branta bernicla</i>           | CW |
|                 | Red-breasted goose          | <i>Branta ruficollis</i>         | GR |
|                 | Eurasian wigeon             | <i>Anas penelope</i>             | IW |
|                 | American wigeon             | <i>Anas americana</i>            | IW |
|                 | Baikal teal                 | <i>Anas formosa</i>              | IW |
|                 | Common teal                 | <i>Anas crecca</i>               | IW |
|                 | Mallard                     | <i>Anas platyrhynchos</i>        | IW |
|                 | American black duck         | <i>Anas rubripes</i>             | IW |
|                 | Northern pintail            | <i>Anas acuta</i>                | IW |
|                 | Northern shoveler           | <i>Anas clypeata</i>             | IW |
|                 | Canvasback                  | <i>Aythya valisineria</i>        | IW |
|                 | Tufted duck                 | <i>Aythya fuligula</i>           | IW |
|                 | Greater scaup               | <i>Aythya marila</i>             | CM |
|                 | Lesser Scaup                | <i>Aythia affinis</i>            | IW |
|                 | Common eider                | <i>Somateria mollissima</i>      | CM |
|                 | King eider                  | <i>Somateria spectabilis</i>     | CM |
|                 | Spectacled eider            | <i>Somateria fischeri</i>        | CM |
|                 | Steller's eider             | <i>Polysticta stelleri</i>       | CM |
|                 | Harlequin duck              | <i>Histrionicus histrionicus</i> | CM |
|                 | Long tailed duck            | <i>Clangula hyemalis</i>         | CM |
|                 | Black scoter                | <i>Melanitta nigra</i>           | CM |
|                 | Surf scoter                 | <i>Melanitta perspicillata</i>   | CM |
|                 | White-winged scoter         | <i>Melanitta fusca</i>           | CM |
|                 | Common goldeneye            | <i>Bucephala clangula</i>        | IW |
|                 | Barrow's Goldeneye          | <i>Bucephala islandica</i>       | CM |
|                 | Smew                        | <i>Mergellus albellus</i>        | IW |
|                 | Red-brested merganser       | <i>Mergus serrator</i>           | CM |

|                       |                        |                                   |    |
|-----------------------|------------------------|-----------------------------------|----|
|                       | Goosander              | <i>Mergus merganser</i>           | IW |
| <b>Pandionidae</b>    | Western osprey         | <i>Pandion haliaetus</i>          | IW |
| <b>Accipitridae</b>   | White-tailed eagle     | <i>Haliaeetus albicilla</i>       | IW |
|                       | Bald eagle             | <i>Haliaeetus leucocephalus</i>   | IW |
|                       | Steller's sea eagle    | <i>Haliaeetus pelagicus</i>       | CW |
|                       | Hen harrier            | <i>Circus cyaneus</i>             | IW |
|                       | Eurasian sparrowhawk   | <i>Accipiter nisus</i>            | DF |
|                       | Sharp-shinned hawk     | <i>Accipiter striatus</i>         | DF |
|                       | Northern goshawk       | <i>Accipiter gentilis</i>         | DF |
|                       | Swainson' hawk         | <i>Buteo swainsoni</i>            | OC |
|                       | Red-tailed hawk        | <i>Buteo jamaicensis</i>          | OC |
|                       | Rough-legged buzzard   | <i>Buteo lagopus</i>              | OC |
|                       | Golden eagle           | <i>Aquila chrysaetos</i>          | OC |
| <b>Falconidae</b>     | Common kestrel         | <i>Falco tinnunculus</i>          | OC |
|                       | American kestrel       | <i>Falco sparverius</i>           | OC |
|                       | Merlin                 | <i>Falco columbarius</i>          | OC |
|                       | Gyr Falcon             | <i>Falco rusticolus</i>           | OC |
|                       | Peregrine falcon       | <i>Falco peregrinus</i>           | OC |
| <b>Gruidae</b>        | Siberian crane         | <i>Grus leucogeranus</i>          | IW |
|                       | Sandhill crane         | <i>Grus canadensis</i>            | GR |
|                       | Common crane           | <i>Grus grus</i>                  | GR |
|                       | Whooping crane         | <i>Grus americana</i>             | IW |
| <b>Rallidae</b>       | Yellow rail            | <i>Coturnicops noveboracensis</i> | IW |
|                       | Sora                   | <i>Porzana carolina</i>           | IW |
| <b>Haematopodidae</b> | Eurasian oystercatcher | <i>Haematopus ostralegus</i>      | CW |
| <b>Charadriidae</b>   | European golden plover | <i>Pluvialis apricaria</i>        | GR |
|                       | Pacific golden plover  | <i>Pluvialis fulva</i>            | GR |
|                       | American golden plover | <i>Pluvialis dominica</i>         | GR |
|                       | Grey plover            | <i>Pluvialis squatarola</i>       | CW |
|                       | Common ringed plover   | <i>Charadrius hiaticula</i>       | CW |
|                       | Semipalmated plover    | <i>Charadrius semipalmatus</i>    | CW |
|                       | Killdeer               | <i>Charadrius vociferus</i>       | GR |
|                       | Lesser sandplover      | <i>Charadrius mongolus</i>        | CW |
|                       | Eurasian dotterel      | <i>Eudromias morinellus</i>       | DE |
|                       | Northern lapwing       | <i>Vanellus vanellus</i>          | GR |
| <b>Scolopacidae</b>   | Eurasian woodcock      | <i>Scolopax rusticola</i>         | DF |
|                       | Pin-tailed snipe       | <i>Gallinago stenura</i>          | IW |
|                       | Great snipe            | <i>Gallinago media</i>            | IW |
|                       | Common snipe           | <i>Gallinago gallinago</i>        | IW |

|                        |                                |    |
|------------------------|--------------------------------|----|
| Jack snipe             | <i>Lymnocyptes minimus</i>     | IW |
| Black-tailed godwit    | <i>Limosa limosa</i>           | CW |
| Hudsonian godwit       | <i>Limosa haemastica</i>       | CW |
| Bar-tailed godwit      | <i>Limosa lapponica</i>        | CW |
| Little curlew          | <i>Numenius minutus</i>        | GR |
| Eskimo curlew          | <i>Numenius borealis</i>       | GR |
| Whimbrel               | <i>Numenius phaeopus</i>       | CW |
| Bristle-thighed curlew | <i>Numenius tahitiensis</i>    | CW |
| Eurasian curlew        | <i>Numenius arquata</i>        | CW |
| Spotted redshank       | <i>Tringa erythropus</i>       | IW |
| Common redshank        | <i>Tringa totanus</i>          | CW |
| Common greenshank      | <i>Tringa nebularia</i>        | IW |
| Greater yellowlegs     | <i>Tringa melanoleuca</i>      | IW |
| Lesser yellowlegs      | <i>Tringa flavipes</i>         | IW |
| Solitary sandpiper     | <i>Tringa solitaria</i>        | IW |
| Green sandpiper        | <i>Tringa ochropus</i>         | IW |
| Wood sandpiper         | <i>Tringa glareola</i>         | IW |
| Terek sandpiper        | <i>Tringa cinereus</i>         | CW |
| Common sandpiper       | <i>Tringa hypoleucos</i>       | IW |
| Spotted sandpiper      | <i>Tringa macularia</i>        | IW |
| Grey-tailed tattler    | <i>Tringa brevipes</i>         | CW |
| Wandering tattler      | <i>Tringa incanus</i>          | CW |
| Ruddy turnstone        | <i>Arenaria interpres</i>      | CW |
| Black turnstone        | <i>Arenaria melanocephala</i>  | CW |
| Short-billed dowitcher | <i>Limnodromus griseus</i>     | CW |
| Long billed dowitcher  | <i>Limnodromus scolopaceus</i> | CW |
| Surfbird               | <i>Aphriza virgata</i>         | CW |
| Great knot             | <i>Calidris tenuirostris</i>   | CW |
| Red knot               | <i>Calidris canutus</i>        | CW |
| Sanderling             | <i>Calidris alba</i>           | CW |
| Semipalmated sandpiper | <i>Calidris pusilla</i>        | CW |
| Western sandpiper      | <i>Calidris mauri</i>          | CW |
| Little stint           | <i>Calidris minuta</i>         | CW |
| Red-necked stint       | <i>Calidris ruficollis</i>     | CW |
| Temminck's stint       | <i>Calidris temminckii</i>     | IW |
| Long toed stint        | <i>Calidris subminuta</i>      | IW |
| Least sandpiper        | <i>Calidris minutilla</i>      | IW |
| White rumped sandpiper | <i>Calidris fuscicollis</i>    | CW |
| Baird's sandpiper      | <i>Calidris bairdii</i>        | IW |

|                       |                                 |                                        |           |
|-----------------------|---------------------------------|----------------------------------------|-----------|
|                       | Pectoral sandpiper              | <i>Calidris melanotos</i>              | IW        |
|                       | Sharp-tailed sandpiper          | <i>Calidris acuminata</i>              | IW        |
|                       | Purple sandpiper                | <i>Calidris maritima</i>               | CW        |
|                       | Rock sandpiper                  | <i>Calidris ptilocnemis</i>            | CW        |
|                       | Dunlin                          | <i>Calidris alpina</i>                 | CW        |
|                       | Curlew sandpiper                | <i>Calidris ferruginea</i>             | CW        |
|                       | Stilt sandpiper                 | <i>Micropalama himantopus</i>          | IW        |
|                       | Buff-breasted sandpiper         | <i>Tryngites subruficollis</i>         | GR        |
|                       | Spoon billed sandpiper          | <i>Eurynorhynchus pygmeus</i>          | CW        |
|                       | Broad billed sandpiper          | <i>Limicola falcinellus</i>            | CW        |
|                       | Ruff                            | <i>Philomachus pugnax</i>              | IW        |
|                       | <b>Red-necked phalarope</b>     | <b><i>Phalaropus lobatus</i></b>       | <b>PE</b> |
|                       | <b>Red phalarope</b>            | <b><i>Phalaropus fulicaria</i></b>     | <b>PE</b> |
| <b>Stercorariidae</b> | <b>Great skua</b>               | <b><i>Catharacta skua</i></b>          | <b>PE</b> |
|                       | <b>Pomarine skua</b>            | <b><i>Stercorarius Pomarinus</i></b>   | <b>PE</b> |
|                       | <b>Arctic skua</b>              | <b><i>Stercorarius parasiticus</i></b> | <b>PE</b> |
|                       | <b>Long tailed skua</b>         | <b><i>Stercorarius longicaudus</i></b> | <b>PE</b> |
| <b>Laridae</b>        | Mew gull                        | <i>Larus canus</i>                     | CW        |
|                       | Larus californicus              | <i>Larus californicus</i>              | CW        |
|                       | Great black backed gull         | <i>Larus marinus</i>                   | CM        |
|                       | Glaucus winged gull             | <i>Larus glaucescens</i>               | CM        |
|                       | Glaucous gull                   | <i>Larus hyperboreus</i>               | CM        |
|                       | Iceland gull                    | <i>Larus glaucoides</i>                | CM        |
|                       | Herring gull                    | <i>Larus argentatus</i>                | CM        |
|                       | Lesser black backed gull        | <i>Larus fuscus</i>                    | CM        |
|                       | Common back headed gull         | <i>Larus ridibundus</i>                | CW        |
|                       | Bonaparte's gull                | <i>Larus philadelphia</i>              | CW        |
|                       | <b>Ivory gull</b>               | <b><i>Pagophila eburnea</i></b>        | <b>PE</b> |
|                       | <b>Ross's gull</b>              | <b><i>Rhodostethia rosea</i></b>       | <b>PE</b> |
|                       | <b>Sabine's gull</b>            | <b><i>Xerna sabini</i></b>             | <b>PE</b> |
|                       | <b>Black legged kittiwake</b>   | <b><i>Rissa tridactyla</i></b>         | <b>PE</b> |
|                       | <b>Red legged kittiwake</b>     | <b><i>Rissa brevirostris</i></b>       | <b>PE</b> |
|                       | Caspian tern                    | <i>Sterna caspia</i>                   | CM        |
|                       | Common tern                     | <i>Sterna hirundo</i>                  | CM        |
| <b>Arctic tern</b>    | <b><i>Sterna paradisaea</i></b> | <b>PE</b>                              |           |
| <b>Aleutian tern</b>  | <b><i>Sterna aleutica</i></b>   | <b>PE</b>                              |           |
| <b>Alcidae</b>        | <b>Little auk</b>               | <b><i>Alle alle</i></b>                | <b>PE</b> |
|                       | <b>Common murre</b>             | <b><i>Uria aalge</i></b>               | <b>PE</b> |
|                       | <b>Thick billed murre</b>       | <b><i>Uria lomvia</i></b>              | <b>PE</b> |



|                      |                           |                                   |           |
|----------------------|---------------------------|-----------------------------------|-----------|
|                      | Razorbill                 | <i>Alca torda</i>                 | CM        |
|                      | Marbled murrelet          | <i>Brachyramphus marmoratus</i>   | CM        |
|                      | Kittlitz's murrelet       | <i>Brachyramphus brevirostris</i> | CM        |
|                      | <b>Ancient murrelet</b>   | <i>Synthliboramphus antiquus</i>  | <b>PE</b> |
|                      | <b>Cassin's auklet</b>    | <i>Ptychoramphus aleuticus</i>    | <b>PE</b> |
|                      | Parakeet auklet           | <i>Cyclorrhynchus psittacula</i>  | CM        |
|                      | Crested auklet            | <i>Aethia cristatella</i>         | CM        |
|                      | <b>Whiskered auklet</b>   | <i>Aethia pygmaea</i>             | <b>PE</b> |
|                      | <b>Least auklet</b>       | <i>Aethia pusilla</i>             | <b>PE</b> |
|                      | <b>Atlantic puffin</b>    | <i>Fratercula arctica</i>         | <b>PE</b> |
|                      | <b>Horned puffin</b>      | <i>Fratercula corniculata</i>     | <b>PE</b> |
|                      | <b>Tufted puffin</b>      | <i>Fratercula cirrhata</i>        | <b>PE</b> |
| <b>Cuculidae</b>     | Common cuckoo             | <i>Cuculus canorus</i>            | TW        |
|                      | Himalayan cuckoo          | <i>Cuculus saturatus</i>          | TF        |
| <b>Strigidae</b>     | Snowy owl                 | <i>Nyctea scandiaca</i>           | OC        |
|                      | Boreal owl                | <i>Aegolius funereus</i>          | DF        |
|                      | Long-eared owl            | <i>Asio otus</i>                  | DF        |
|                      | Short-eared owl           | <i>Asio flammeus</i>              | OC        |
| <b>Caprimulgidae</b> | Common nighthawk          | <i>Chordeiles minor</i>           | OC        |
| <b>Apodidae</b>      | Pacific swift             | <i>Apus pacificus</i>             | OC        |
| <b>Alcedinidae</b>   | Belted kingfisher         | <i>Ceryle alcyon</i>              | IW        |
| <b>Picidae</b>       | Eurasian wryneck          | <i>Jynx torquilla</i>             | TW        |
|                      | Yellow-bellied sapsucker  | <i>Sphyrapicus varius</i>         | DF        |
|                      | Hairy woodpecker          | <i>Picoides villosus</i>          | DF        |
|                      | Northern flicker          | <i>Colaptes auratus</i>           | DF        |
| <b>Tyrannidae</b>    | Olive-sided flycatcher    | <i>Contopus borealis</i>          | TF        |
|                      | Western wood pewee        | <i>Contopus sordidulus</i>        | TF        |
|                      | Yellow-bellied flycatcher | <i>Empidonax flaviventris</i>     | TF        |
|                      | Alder flycatcher          | <i>Empidonax alnorum</i>          | TF        |
|                      | Least flycatcher          | <i>Empidonax minimus</i>          | TF        |
|                      | Eastern phoebe            | <i>Sayornis phoebe</i>            | OC        |
|                      | Say's phoebe              | <i>Sayornis saya</i>              | OC        |
|                      | Eastern kingbird          | <i>Tyrannus tyrannus</i>          | OC        |
| <b>Alaudidae</b>     | Eurasian skylark          | <i>Alauda arvensis</i>            | GR        |
|                      | Horned lark               | <i>Eremophila alpestris</i>       | GR        |
| <b>Hirundinidae</b>  | Tree swallow              | <i>Tachycineta bicolor</i>        | OC        |
|                      | Violet green swallow      | <i>Tachycineta thalassina</i>     | OC        |
|                      | Sand martin               | <i>Riparia riparia</i>            | IW        |

|                                   |                         |                                |    |
|-----------------------------------|-------------------------|--------------------------------|----|
|                                   | Barn swallow            | <i>Hirundo rustica</i>         | OC |
|                                   | Cliff swallow           | <i>Hirundo pyrrhonota</i>      | OC |
|                                   | House martin            | <i>Delichon urbica</i>         | TF |
| <b>Motocillidae</b>               | White wagtail           | <i>Motacilla alba</i>          | OC |
|                                   | Citrine wagtail         | <i>Motacilla citreola</i>      | IW |
|                                   | Western yellow wagtail  | <i>Motacilla flava</i>         | GR |
|                                   | Tree pipit              | <i>Anthus trivialis</i>        | TW |
|                                   | Olive-backed pipit      | <i>Anthus hodgsoni</i>         | TW |
|                                   | Pechora pipit           | <i>Anthus gustavi</i>          | TF |
|                                   | Meadow pipit            | <i>Anthus pratensis</i>        | GR |
|                                   | Red-throated pipit      | <i>Anthus cervinus</i>         | IW |
|                                   | Eurasian Rock Pipit     | <i>Anthus petrosus</i>         | CW |
|                                   | Buff bellied pipit      | <i>Anthus rubescens</i>        | IW |
| <b>Laniidae</b>                   | Brown shrike            | <i>Lanius cristatus</i>        | OC |
|                                   | Great grey shrike       | <i>Lanius excubitor</i>        | OC |
| <b>Bombycillidae</b>              | Bohemian waxwing        | <i>Bombycilla garrulus</i>     | DF |
| <b>Cinclidae</b>                  | White-troated dipper    | <i>Cinclus cinclus</i>         | IW |
| <b>Troglodytidae</b>              | Eurasian wren           | <i>Troglodytes troglodytes</i> | DF |
| <b>Prunellidae</b>                | Siberian accentor       | <i>Prunella montanella</i>     | DF |
|                                   | Dunnock                 | <i>Prunella modularis</i>      | DF |
| <b>Muscicapidae-<br/>Turdinae</b> | Varied thrush           | <i>Zoothera naevia</i>         | DF |
|                                   | Grey-cheeked thrush     | <i>Catharus minimus</i>        | TF |
|                                   | Swainson's thrush       | <i>Catharus ustulatus</i>      | TF |
|                                   | Hermit thrush           | <i>Catharus guttatus</i>       | TF |
|                                   | Ring ouzel              | <i>Turdus torquatus</i>        | OC |
|                                   | Common blackbird        | <i>Turdus merula</i>           | DF |
|                                   | Eyebrowed thrush        | <i>Turdus obscurus</i>         | TF |
|                                   | Naumann's thrush        | <i>Turdus naumanni</i>         | DF |
|                                   | Fielfare                | <i>Turdus pilaris</i>          | DF |
|                                   | Redwing                 | <i>Turdus iliacus</i>          | DF |
|                                   | Song thrush             | <i>Turdus philomelos</i>       | DF |
|                                   | Mistle thrush           | <i>Turdus viscivorus</i>       | DF |
|                                   | American robin          | <i>Turdus migratorius</i>      | DF |
|                                   | European robin          | <i>Erithacus rubecula</i>      | DF |
|                                   | Siberian rubythroat     | <i>Luscinia calliope</i>       | TW |
|                                   | Bluethroat              | <i>Luscinia svecica</i>        | IW |
|                                   | Red-flanked bluetail    | <i>Tarsiger cyanurus</i>       | TF |
|                                   | Common redstart         | <i>Phoenicurus phoenicurus</i> | TW |
| Whinchat                          | <i>Saxicola rubetra</i> | TW                             |    |

|                                |                                  |                                   |                          |
|--------------------------------|----------------------------------|-----------------------------------|--------------------------|
|                                | Siberian stonechat               | <i>Saxicola maura</i>             | OC                       |
|                                | Northern wheatear                | <i>Oenanthe oenanthe</i>          | OC                       |
| <b>Muscicapidae-sylviinae</b>  | Lanceolated Warbler              | <i>Locustella lanceolata</i>      | GR                       |
|                                | Sedge warbler                    | <i>Acrocephalus schoenobaenus</i> | IW                       |
|                                | Willow warbler                   | <i>Phylloscopus trochilus</i>     | TW                       |
|                                | Common chiffchaff                | <i>Phylloscopus collybita</i>     | TW                       |
|                                | Yellow-browed warbler            | <i>Phylloscopus inornatus</i>     | TF                       |
|                                | Arctic warbler                   | <i>Phylloscopus borealis</i>      | TF                       |
|                                | Eurasian blackcap                | <i>Sylvia atricapilla</i>         | TW                       |
|                                | Garden warbler                   | <i>Sylvia borin</i>               | TW                       |
|                                | Rugy-crowned kinglet             | <i>Regulus calendula</i>          | DF                       |
|                                | Goldcrest                        | <i>Regulus regulus</i>            | DF                       |
|                                | Golden-crowned kinglet           | <i>Regulus satrapa</i>            | DF                       |
|                                | <b>Muscicapidae-Muscicapinae</b> | Spotted flycatcher                | <i>Muscicapa striata</i> |
| European pied flycatcher       |                                  | <i>Ficedula hypoleuca</i>         | TF                       |
| Red-breasted flycatcher        |                                  | <i>Ficedula parva</i>             | TF                       |
| <b>Certhiidae</b>              | Eurasian treecreeper             | <i>Certhia familiaris</i>         | DF                       |
|                                | Brown creeper                    | <i>Certhia americana</i>          | DF                       |
| <b>Emberizidae-Emberizinae</b> | Yellowhammer                     | <i>Emberiza citrinella</i>        | GR                       |
|                                | Little bunting                   | <i>Emberiza pusilla</i>           | OC                       |
|                                | Rustic bunting                   | <i>Emberiza rustica</i>           | DF                       |
|                                | Yellow-breasted bunting          | <i>Emberiza aureola</i>           | GR                       |
|                                | Pallas's reed bunting            | <i>Emberiza pallasi</i>           | IW                       |
|                                | Common reed bunting              | <i>Emberiza schoeniclus</i>       | IW                       |
|                                | Lapland longspur                 | <i>Calcarius lapponicus</i>       | GR                       |
|                                | Smith's longspur                 | <i>Calcarius pictus</i>           | GR                       |
|                                | Snow bunting                     | <i>Plectrophenax nivalis</i>      | OC                       |
|                                | McKay's bunting                  | <i>Plectrophenax hyperboreus</i>  | OC                       |
|                                | Red fox sparrow                  | <i>Passerella iliaca</i>          | DF                       |
|                                | Song sparrow                     | <i>Melospiza melodia</i>          | DF                       |
|                                | Lincoln's sparrow                | <i>Melospiza lincolnii</i>        | IW                       |
|                                | Swamps sparrow                   | <i>Melospiza georgiana</i>        | IW                       |
|                                | Harris's sparrow                 | <i>Zonotrichia querula</i>        | DF                       |
|                                | White-crowned sparrow            | <i>Zonotrichia leucophrys</i>     | DF                       |
|                                | White throated sparrow           | <i>Zonotrichia albicollis</i>     | DF                       |
|                                | Golden-crowned sparrow           | <i>Zonotrichia atricapilla</i>    | DF                       |
|                                | Dark-eyed junco                  | <i>Junco hyemalis</i>             | DF                       |
| Savannah sparrow               | <i>Passerculus sandwichensis</i> | GR                                |                          |

|                     |                         |                                 |    |
|---------------------|-------------------------|---------------------------------|----|
|                     | American tree sparrow   | <i>Spizella arborea</i>         | OC |
|                     | Chipping sparrow        | <i>Spizella passerina</i>       | GR |
| <b>Parulidae</b>    | Tennessee warbler       | <i>Vermivora peregrina</i>      | TF |
|                     | Orange-crowned warbler  | <i>Vermivora celata</i>         | TF |
|                     | American yellow warbler | <i>Dendroica petechia</i>       | TF |
|                     | Yellow-rumped warbler   | <i>Dendroica coronata</i>       | DF |
|                     | Blackpoll warbler       | <i>Dendroica striata</i>        | TF |
|                     | Black and white warbler | <i>Mniotilta varia</i>          | TF |
|                     | Northern waterthrush    | <i>Seiurus noveboracensis</i>   | IW |
|                     | Wilson's warbler        | <i>Wilsonia pusilla</i>         | TF |
| <b>Vireonidae</b>   | Red-eyed vireo          | <i>Vireo olivaceus</i>          | TF |
|                     | Warbling vireo          | <i>Vireo gilvus</i>             | TF |
| <b>Icteridae</b>    | Red-winged blackbird    | <i>Agelaius phoeniceus</i>      | IW |
|                     | Rusty blackbird         | <i>Euphagus carolinus</i>       | DF |
| <b>Fringillidae</b> | Brambling               | <i>Fringilla montifringilla</i> | DF |
|                     | Pine siskin             | <i>Carduelis pinus</i>          | DF |
|                     | Arctic redpoll          | <i>Carduelis hornemanni</i>     | DF |
|                     | Common redpoll          | <i>Carduelis flammea</i>        | DF |
|                     | Twite                   | <i>Carduelis flavirostris</i>   | OC |
|                     | Asian rosy finch        | <i>Leucosticte arctoa</i>       | OC |
|                     | Common rosefinch        | <i>Carpodacus erythrinus</i>    | TF |
|                     | Purple finch            | <i>Carpodacus purpureus</i>     | DF |
|                     | Pine grosbeak           | <i>Pinicola enucleator</i>      | DF |
|                     | Red crossbill           | <i>Loxia curvirostra</i>        | DF |
| <b>Sturnidae</b>    | Common starling         | <i>Sturnus vulgaris</i>         | OC |
| <b>Corvidae</b>     | American crow           | <i>Corvus brachyrhynchos</i>    | OC |
|                     | Carrion crow            | <i>Corvus corone</i>            | OC |

## Supplemental materials IV: List of coastal/marine bird species likely to be able to cope with the polar night according to bibliographic information

Families, Latin names and code for winter's habitats are those used in CAFF's technical report (Scott, 1998)

| <b>Families</b>          | <b>Common names</b>      | <b>Latin names</b>            | <b>References about nocturnal activity</b>      |
|--------------------------|--------------------------|-------------------------------|-------------------------------------------------|
| <b>Gaviidae</b>          | White billed diver       | <i>Gavia adamsii</i>          | Earnst, 2004                                    |
| <b>Procellariidae</b>    | Northern fulmar          | <i>Fulmarus glacialis</i>     | Berge et al., 2012                              |
|                          | Manx shearwater          | <i>Puffinus puffinus</i>      | Martin et al., 1991                             |
| <b>Hydrobatidae</b>      | European storm petrel    | <i>Hydrobates pelagicus</i>   | del Hoyo et al., 1996                           |
|                          | Leach's storm-petrel     | <i>Oceanodroma leucorhoa</i>  |                                                 |
|                          | Fork-tailed storm-petrel | <i>Oceanodroma furcata</i>    |                                                 |
| <b>Phalacrocoracidae</b> | Double-crested cormorant | <i>Phalacrocorax auritus</i>  | King et al., 1998                               |
|                          | Great cormorant          | <i>Phalacrocorax carbo</i>    | Grémillet, 2005                                 |
| <b>Anatidae</b>          | Greater scaup            | <i>Aythya marila</i>          | Beynon et al., 1981                             |
|                          | Common eider             | <i>Somateria mollissima</i>   | Merkel et al., 2008;<br>Merkel & Mosbech, 2007  |
|                          | Steller's eider          | <i>Polysticta stelleri</i>    | Systad & Bustnes, 2001                          |
| <b>Scolopacidae</b>      | Red phalarope            | <i>Phalaropus fulicaria</i>   | McNeil et al., 1992                             |
| <b>Stercorariidae</b>    | Great skua               | <i>Catharacta skua</i>        | Votier et al., 2006                             |
| <b>Laridae</b>           | Great black backed gull  | <i>Larus marinus</i>          | Garthe & Huppopp, 1996                          |
|                          | Lesser black backed gull | <i>Larus fuscus</i>           |                                                 |
|                          | Ivory gull               | <i>Pagophila eburnea</i>      | Defenders of wildlife, 2007                     |
|                          | Black legged kittiwake   | <i>Rissa tridactyla</i>       | Berge et al., 2012                              |
|                          | Red legged kittiwake     | <i>Rissa brevirostris</i>     | Storer, 1987; Orben et al., 2014                |
| <b>Alcidae</b>           | Little auk               | <i>Alle alle</i>              | Berge et al., 2015;<br>Ostaszewsha et al., 2017 |
|                          | Common murre             | <i>Uria aalge</i>             | Regular et al., 2011                            |
|                          | Thick billed murre       | <i>Uria lomvia</i>            | Regular et al., 2011                            |
|                          | Razorbill                | <i>Alca torda</i>             | Bienvenuti et al., 2001                         |
|                          | Cassin's auklet          | <i>Pachoramphus aleuticus</i> | Nelson, 1989                                    |
|                          | Whiskered auklet         | <i>Aethia pygmaea</i>         | Zubakin & Konyukhov, 1999                       |

## Supplemental materials V: Mapping current and future projection of little auks' habitats according to climatic models

Graticules are set at a 15° interval and the map is projected as North Pole Lambert Azimuthal Equal Area. This map and the followings have been made using R software (version 3.5.1, <https://cran.r-project.org/>) thanks “maptools”, “rgdal”, “rgeos” and “sp” packages.

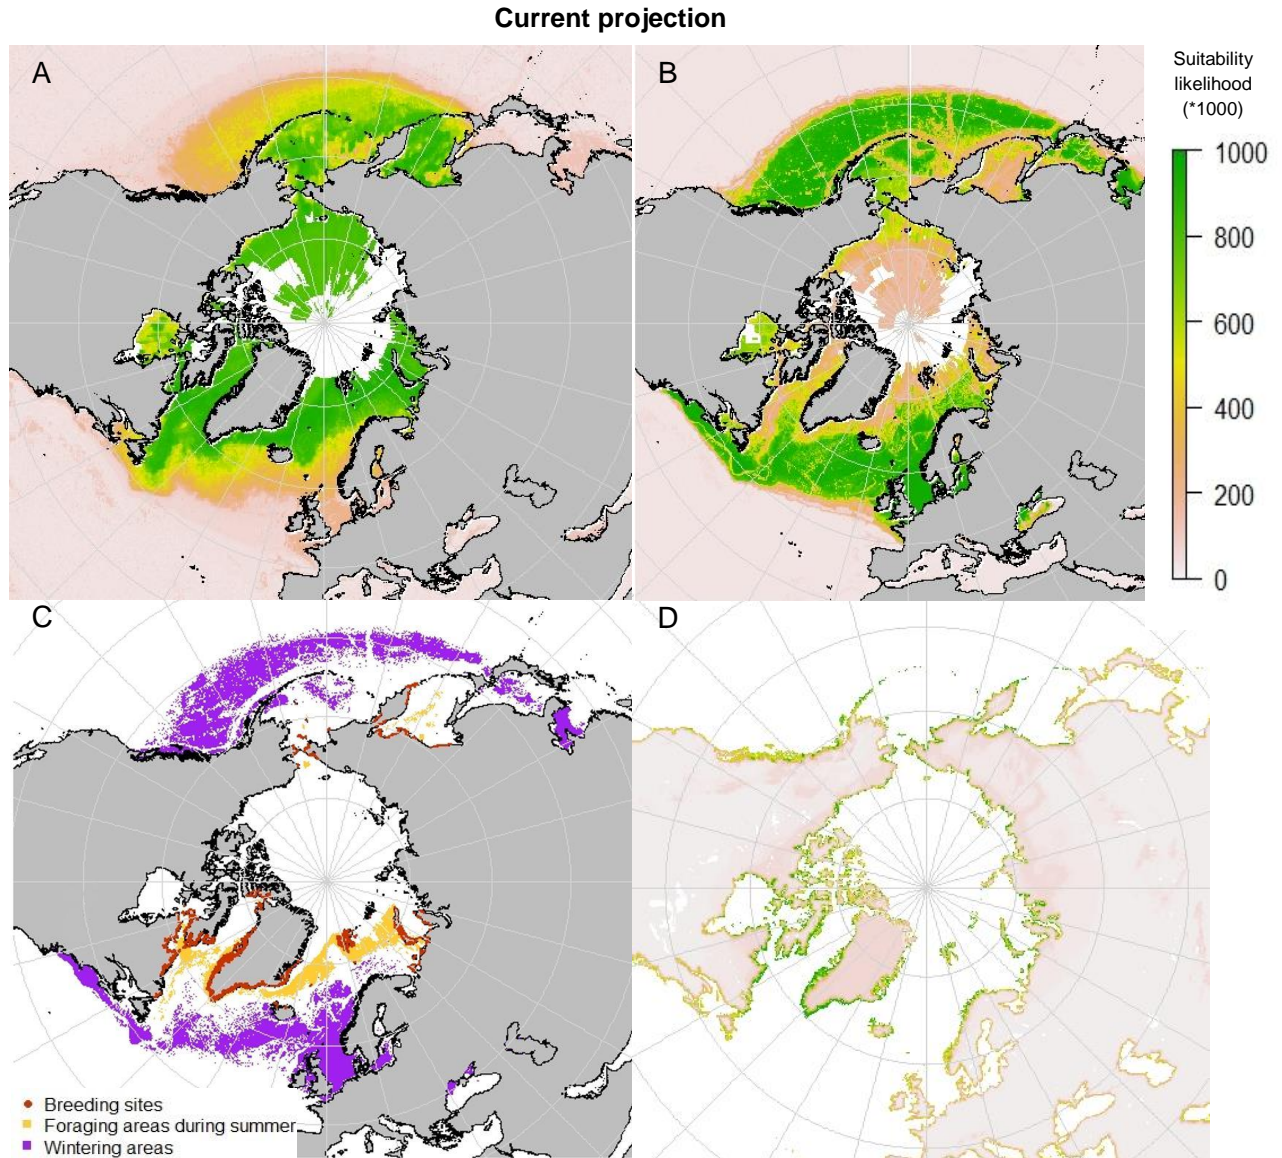

Projection of suitability probability (\*1000) between 2000-2017 for foraging during summer (figure A), winter (figure B) and breeding (figure D). Suitable habitats (suitability likelihood >0.9) for those periods are shown in figure C.

In the following parts, projection of suitability probability (\*1000) between 2050-2059 for foraging during summer (figure A), winter (figure B) and breeding (figure D) obtained with the four climatic models within the RCP8.5 scenario are presented. Suitable habitats (suitability likelihood >0.9) for those periods are shown in figure C. Changes in the distribution of suitable foraging (figure E) and wintering (figure F) areas between present (2000-2017) and future (2050-2059, climatic model considered, scenario RCP 8.5) have been deduced comparing projection output.

### Future projection with the HadGEM2-CC climatic model

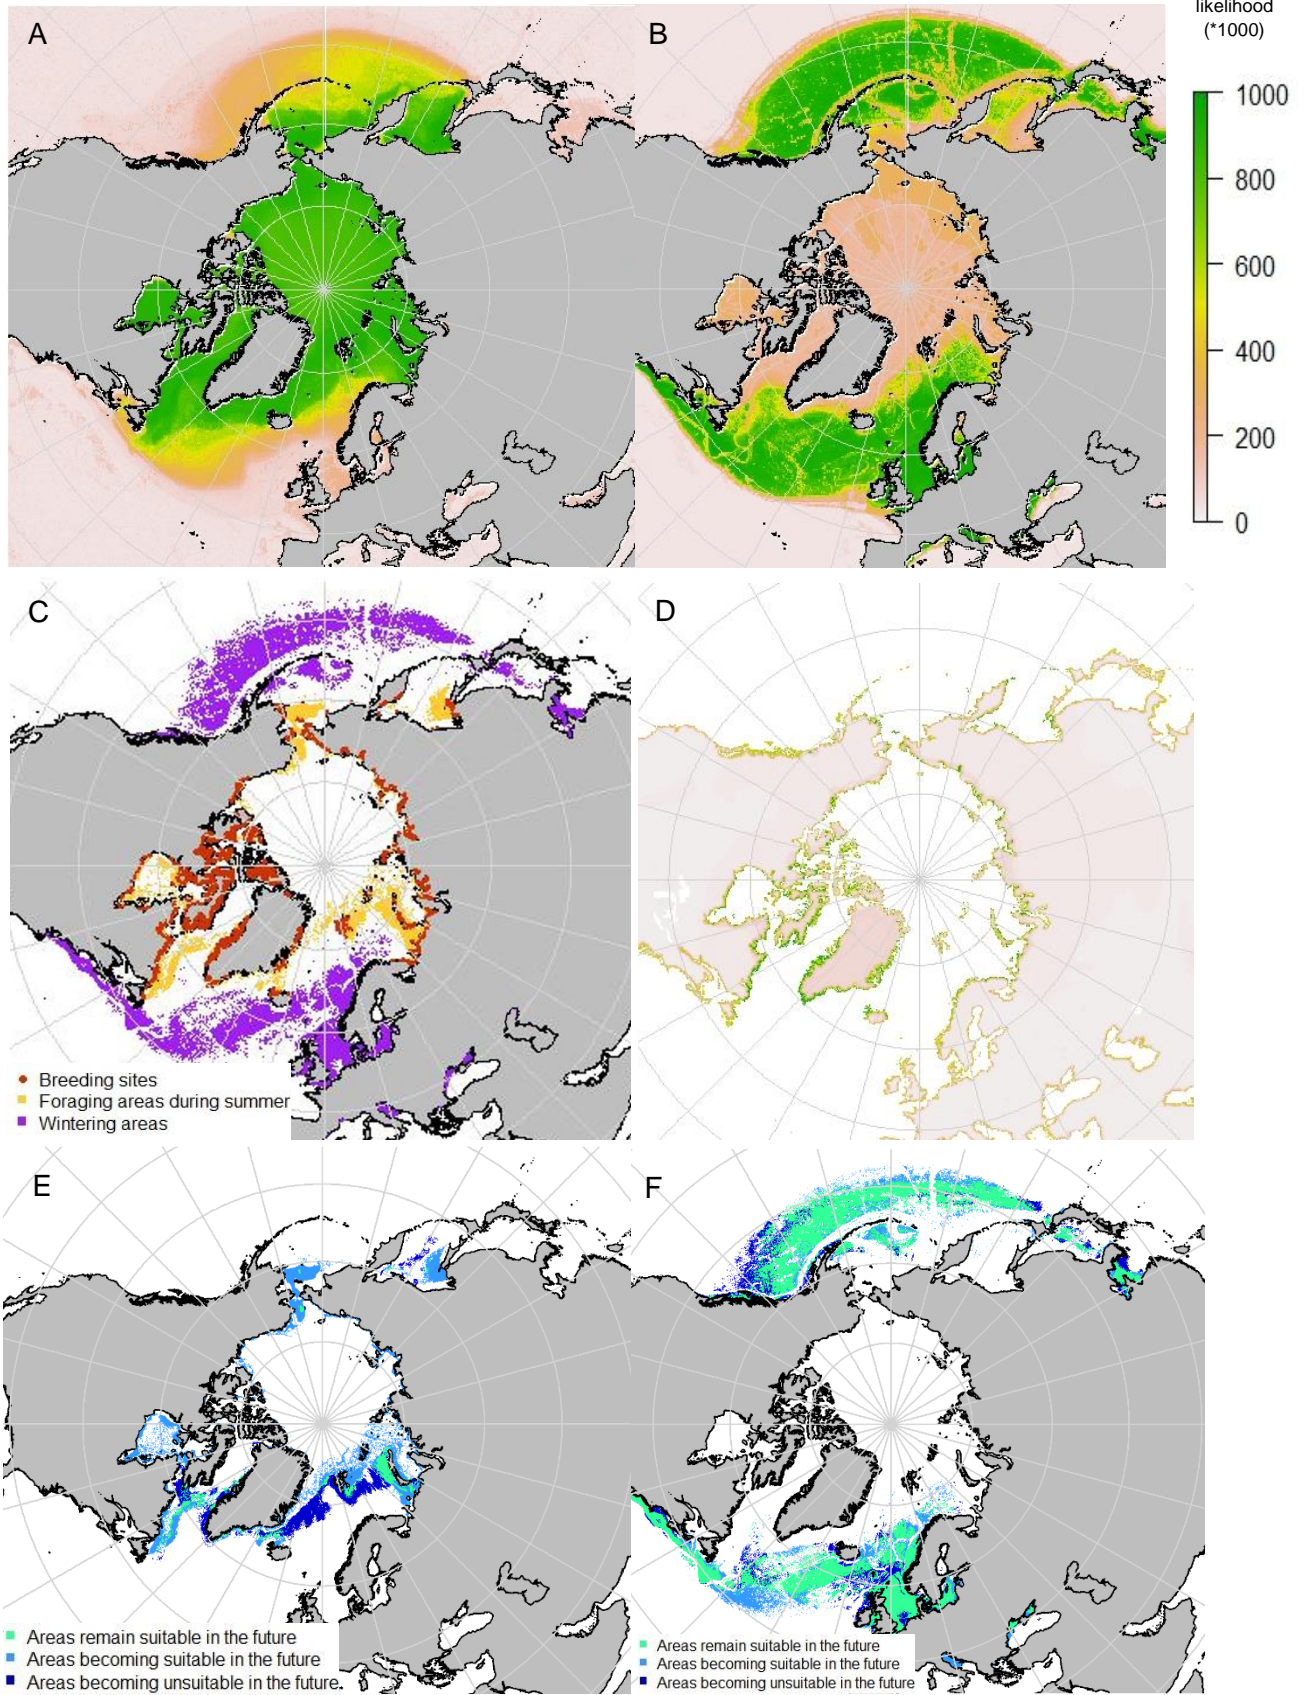

## Future projection with the HadGEM2-ES climatic model

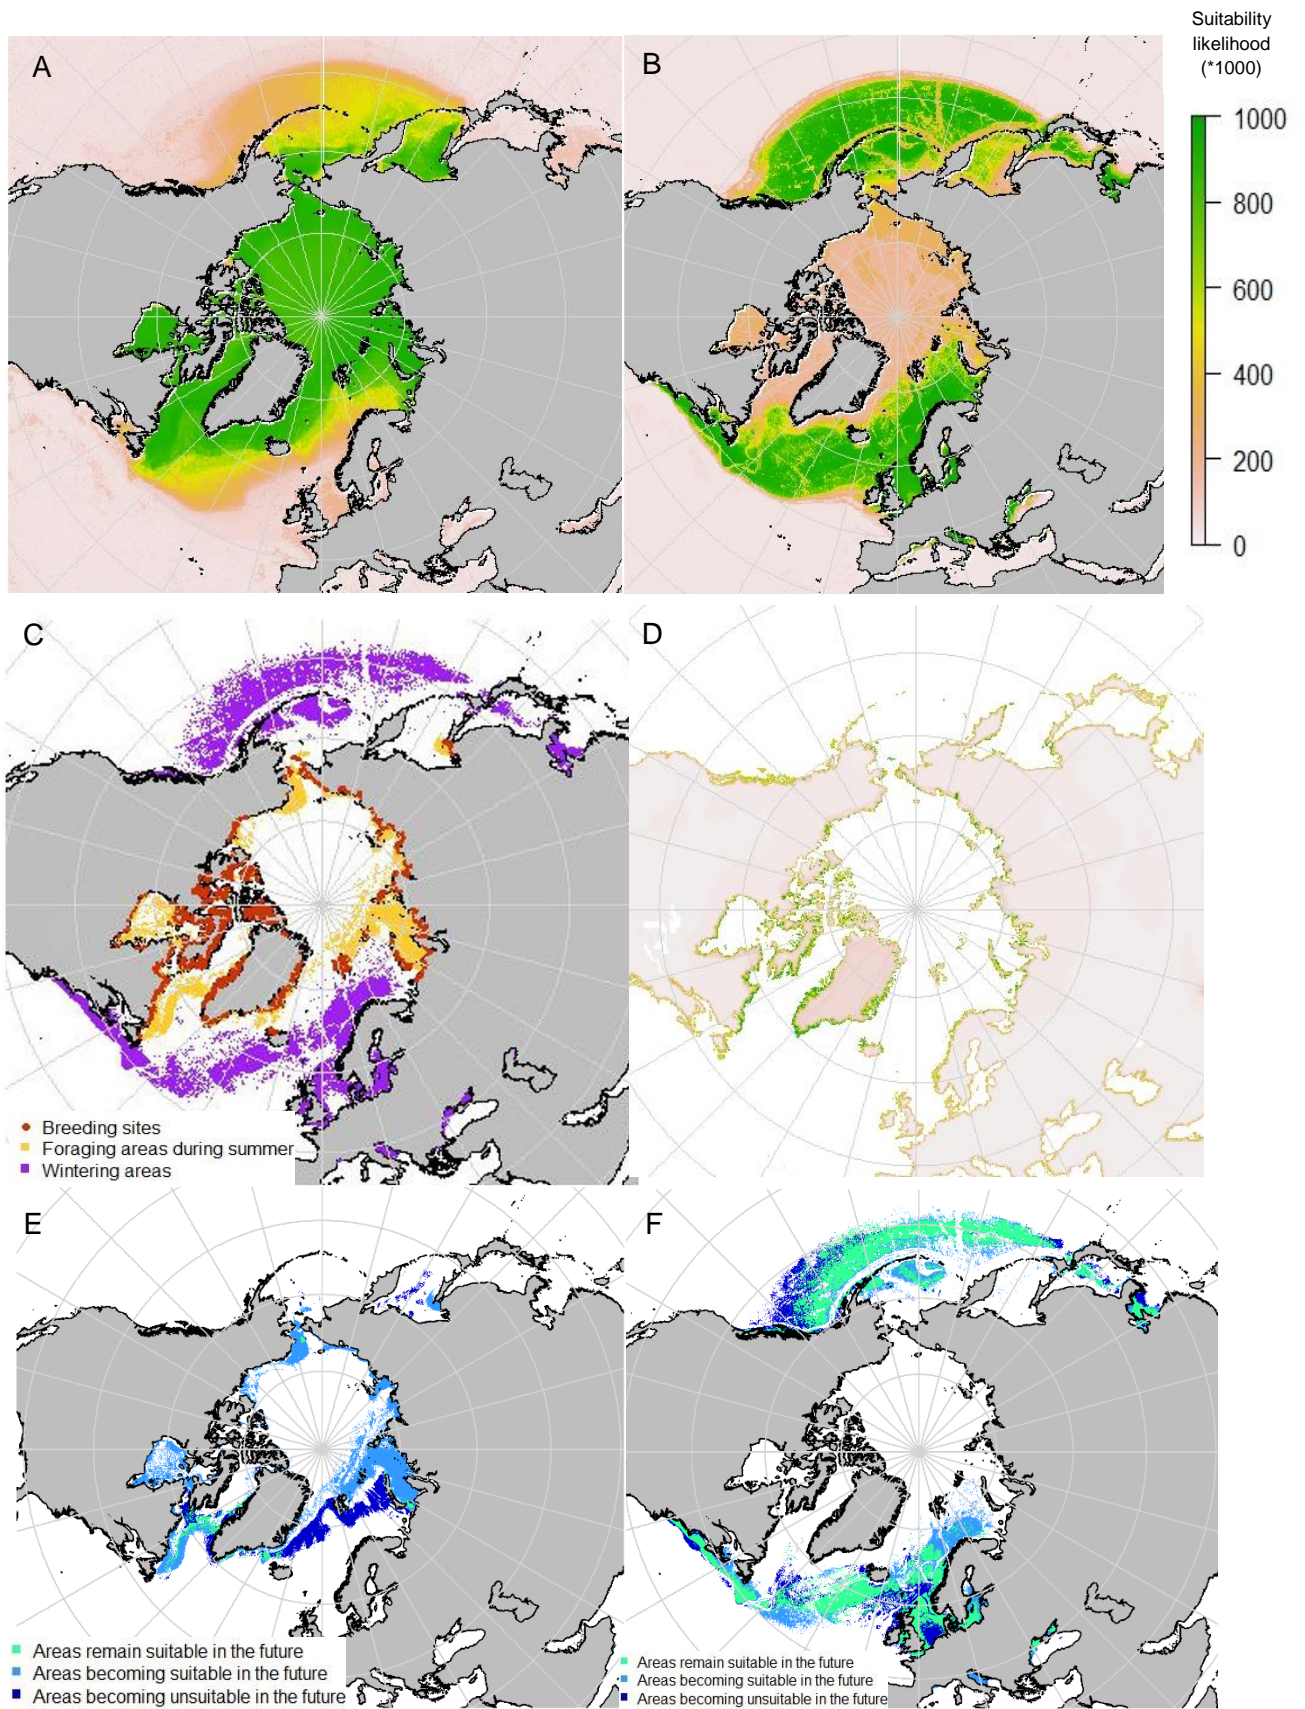



Future projection with the ACCESS 1.0 climatic model

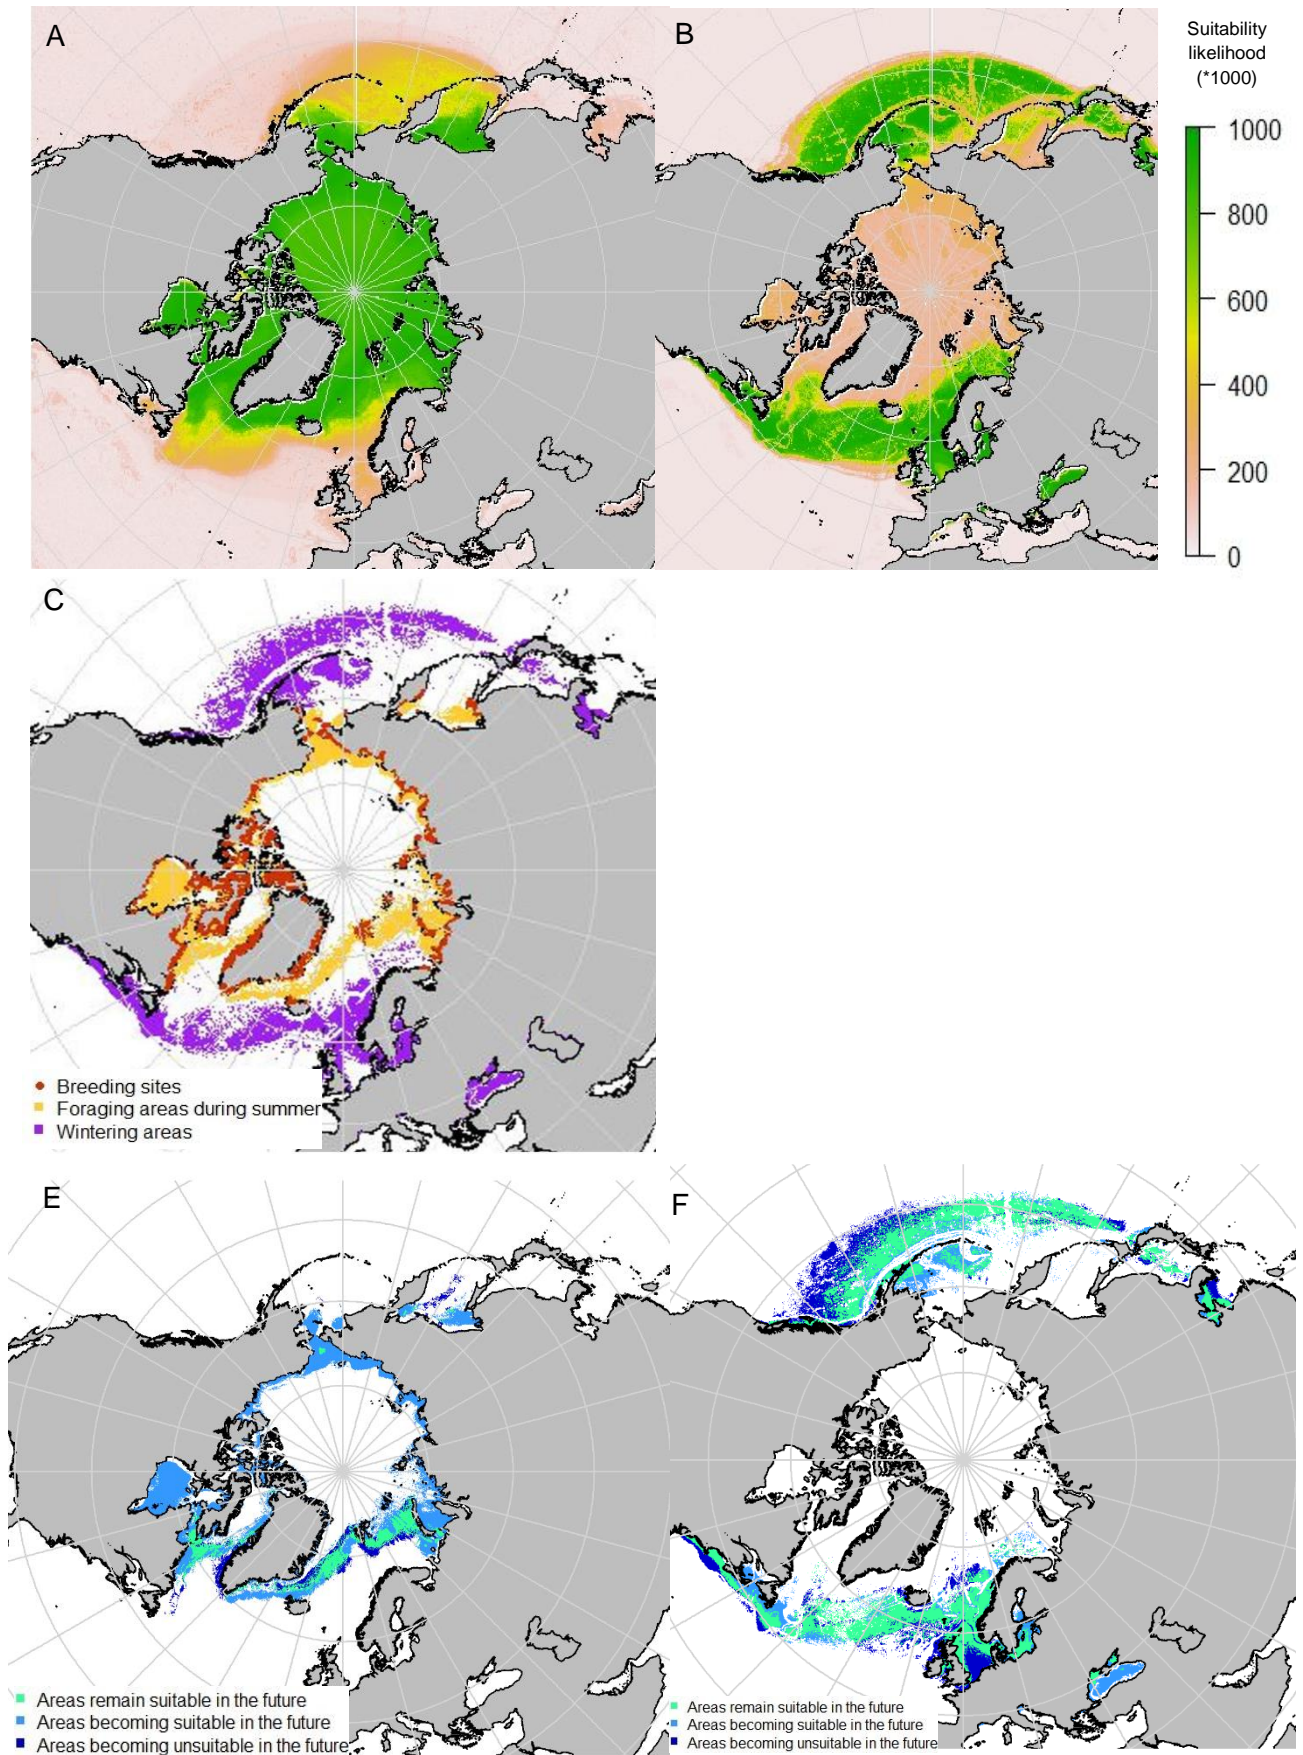

Breeding sites are those obtained with the HadGEM models (figure D is missing).

Future projection with the ACCESS 1.3 climatic model

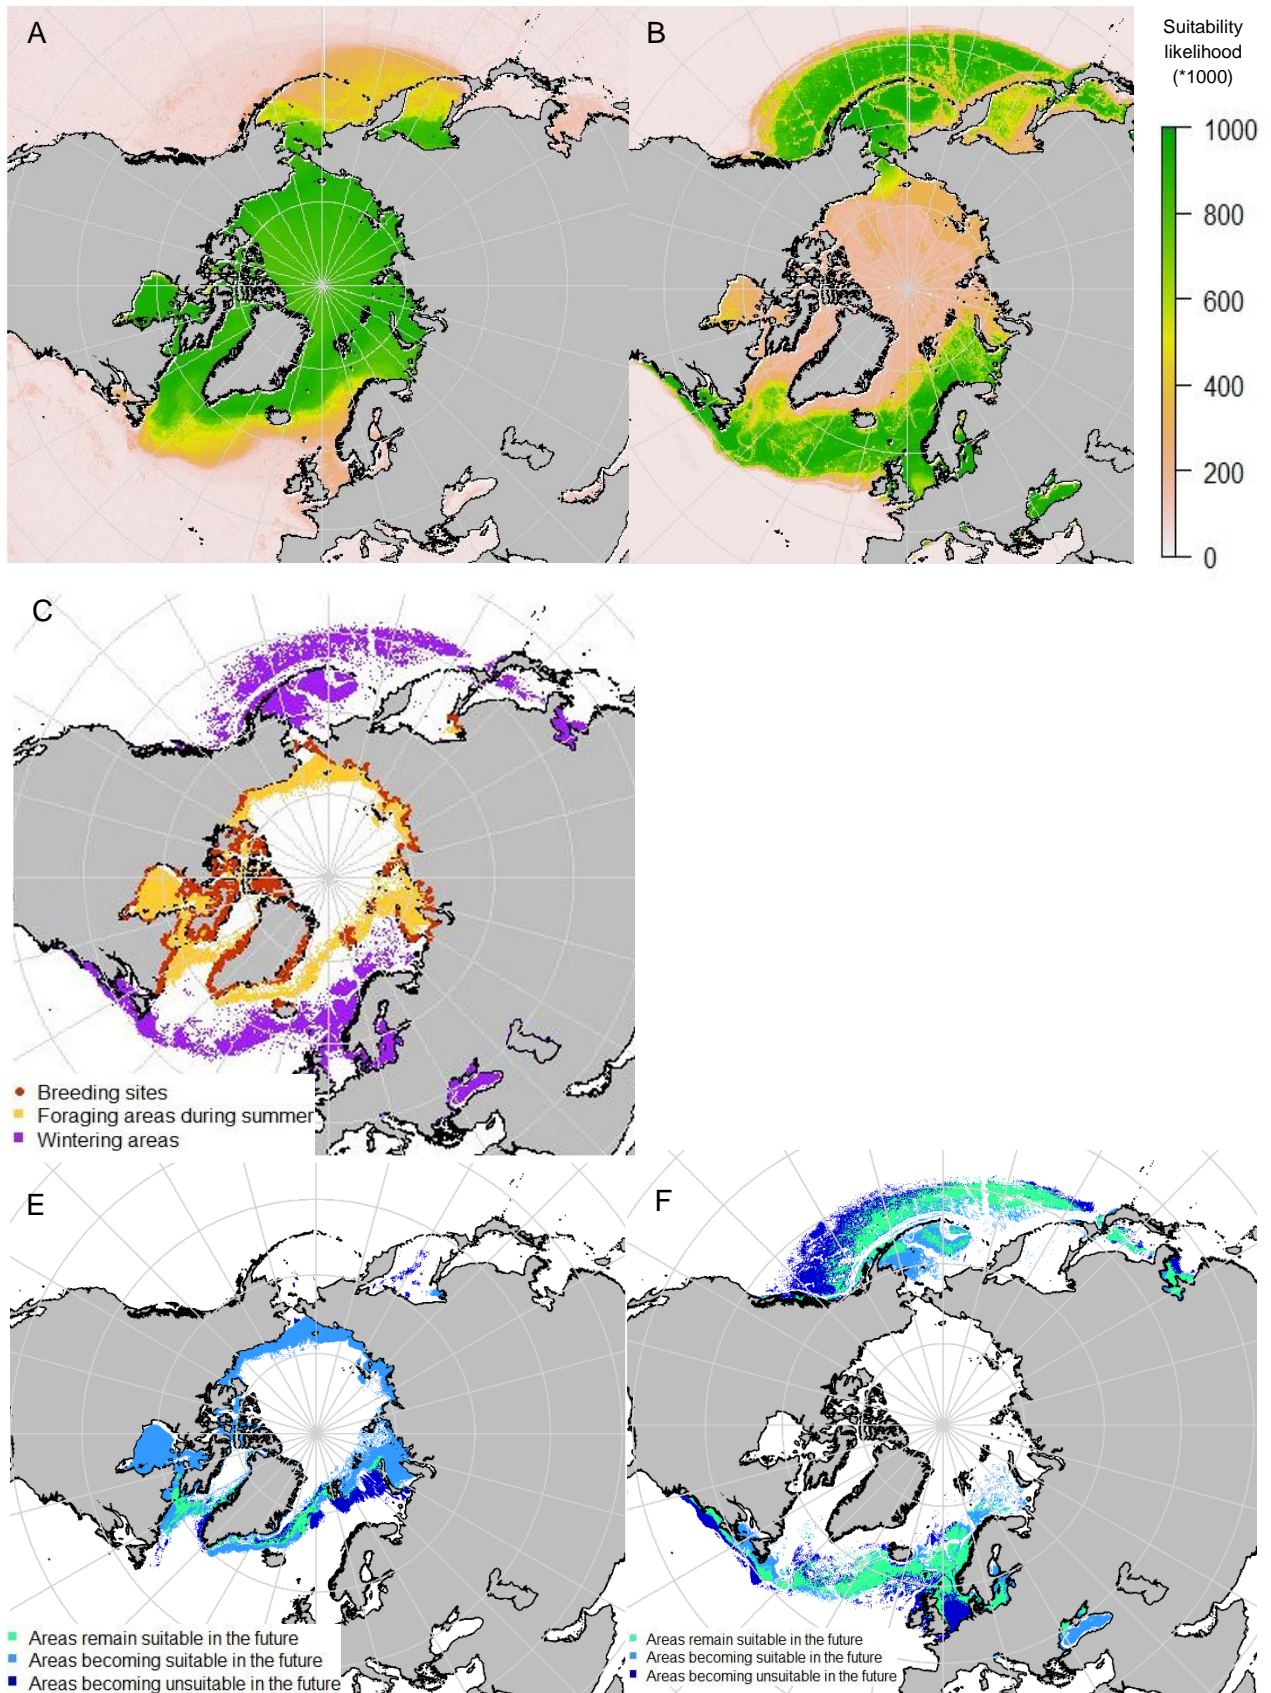

Breeding sites are those obtained with the HadGEM models (figure D is missing).

## Supplemental materials VI: Coefficient of variation between climatic models for each kind of habitats

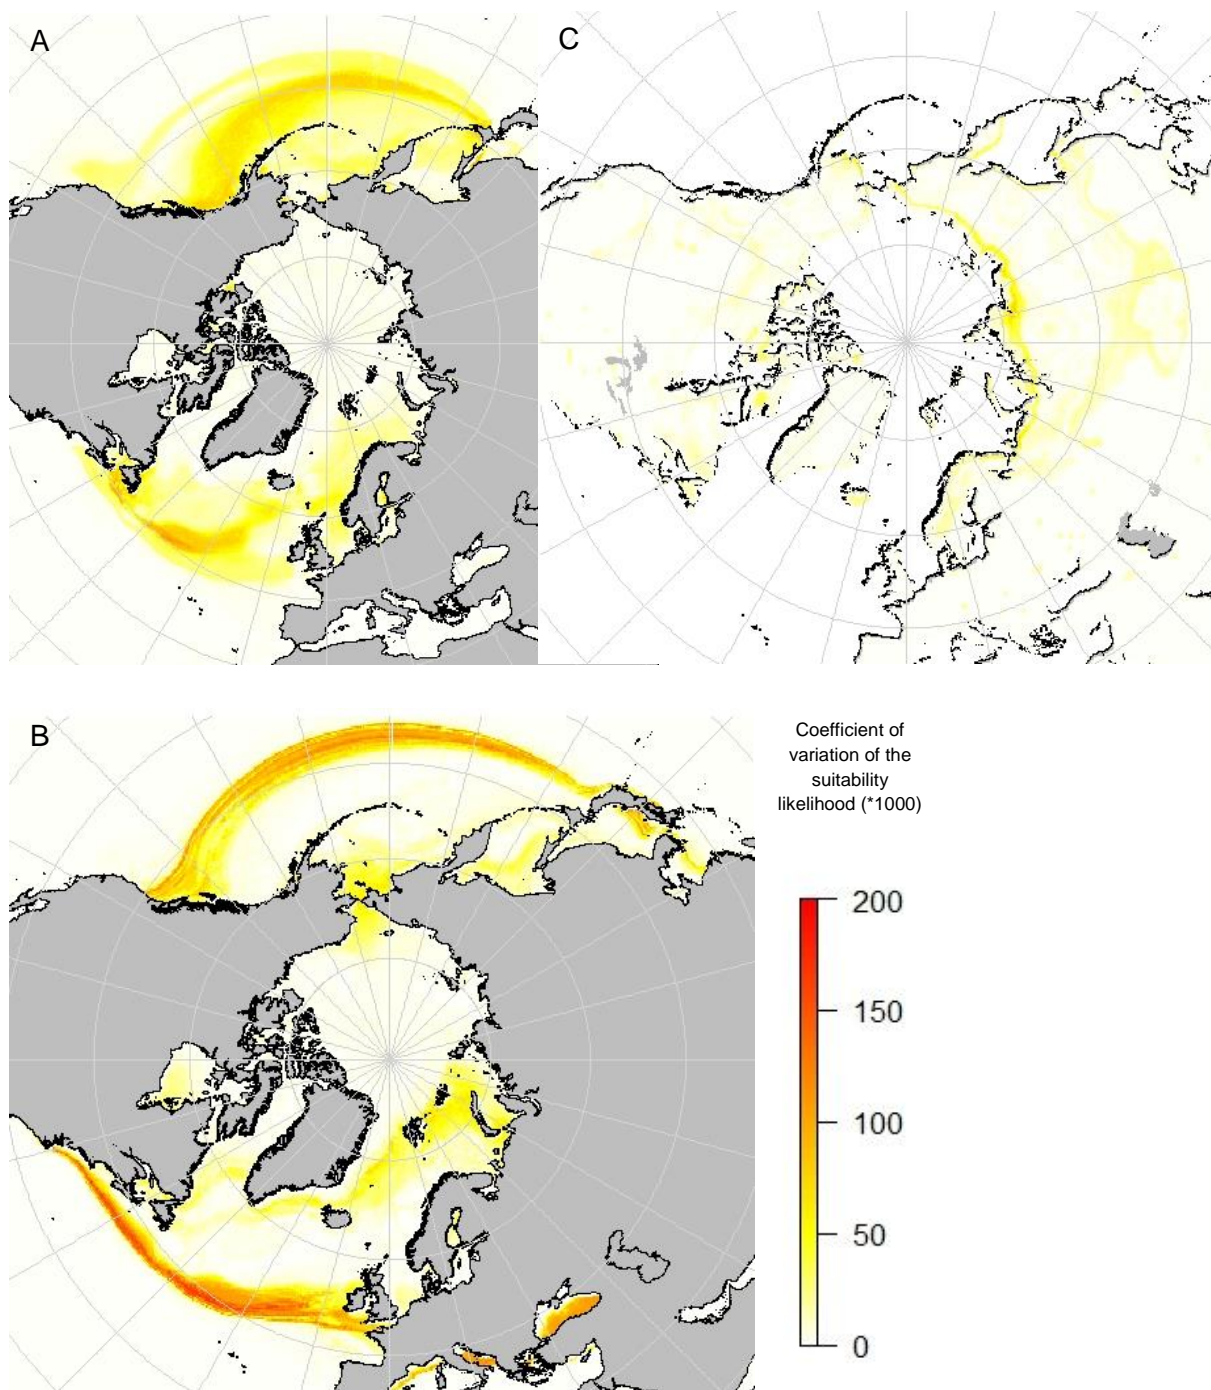

Coefficient of variation of suitability probability (\*1000) for the four climatic models during summer (figure A), winter (figure B) and breeding (figure C) periods. For breeding, only HadGEM2-CC and HadGEM2-ES outputs are considered.

**Supplemental materials VII: Potential suitable (suitability likelihood > 0.9) little auk breeding habitats involved in the residency strategy, currently (2000-2017) and in the future (2050-2059, RCP 8.5 scenario) according to the four climatic models.**

**Current projection**

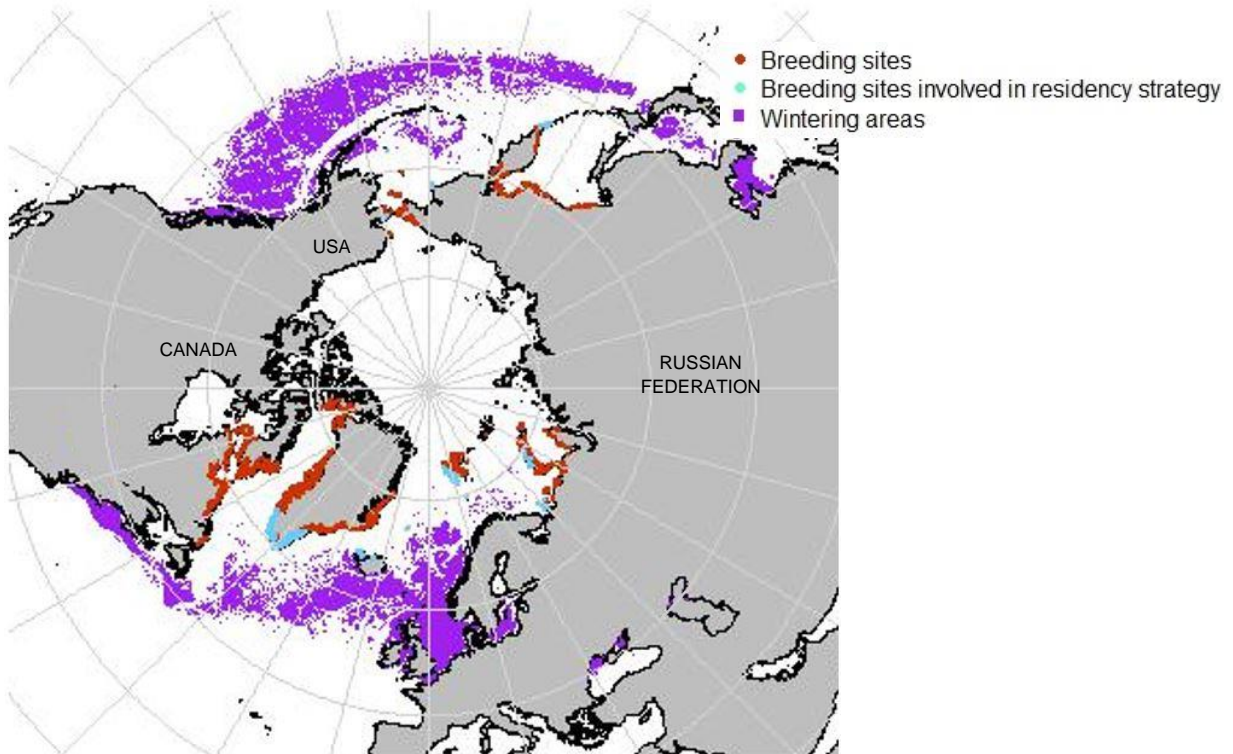

**Future projection with the HadGEM2-CC climatic model**

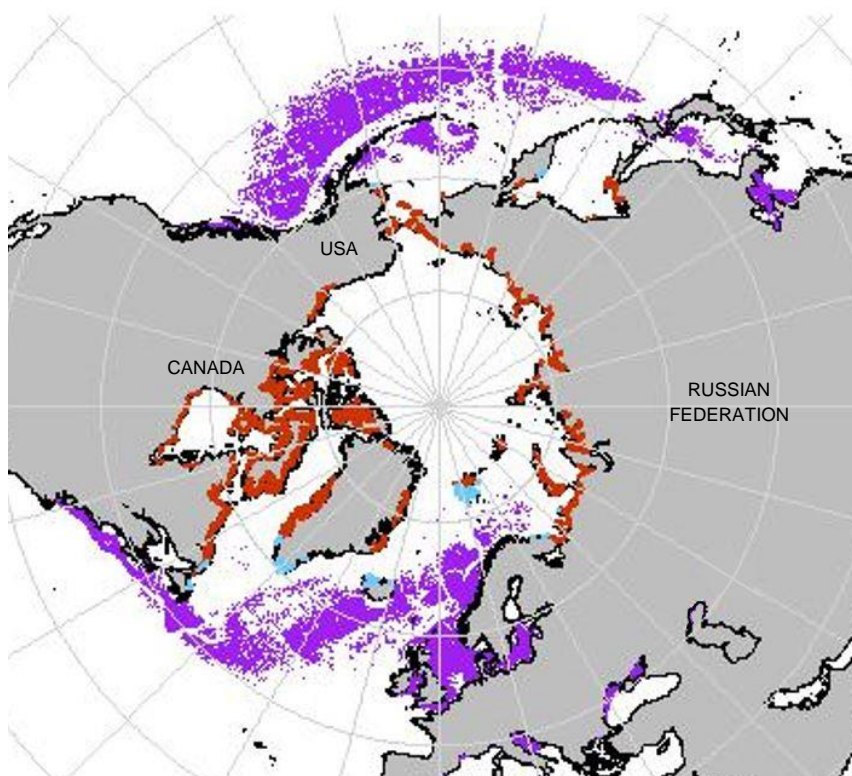

**Future projection with the HadGEM2-ES climatic model**

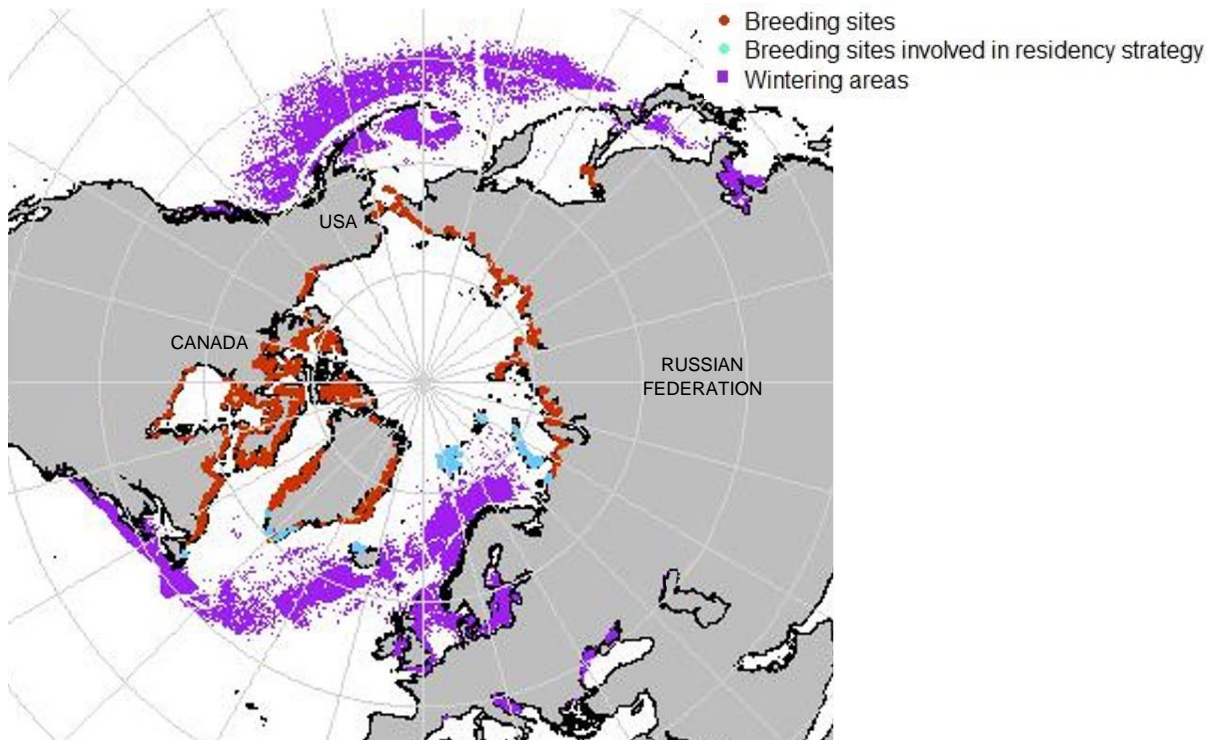

**Future projection with the ACCESS 1.0 climatic model**

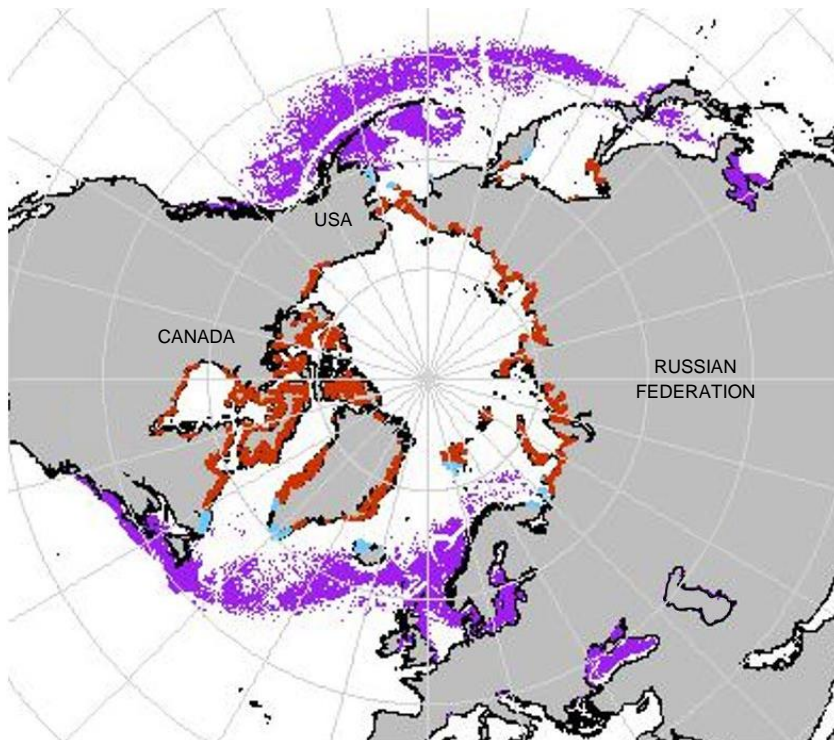

**Future projection with the ACCESS 1.3 climatic model**

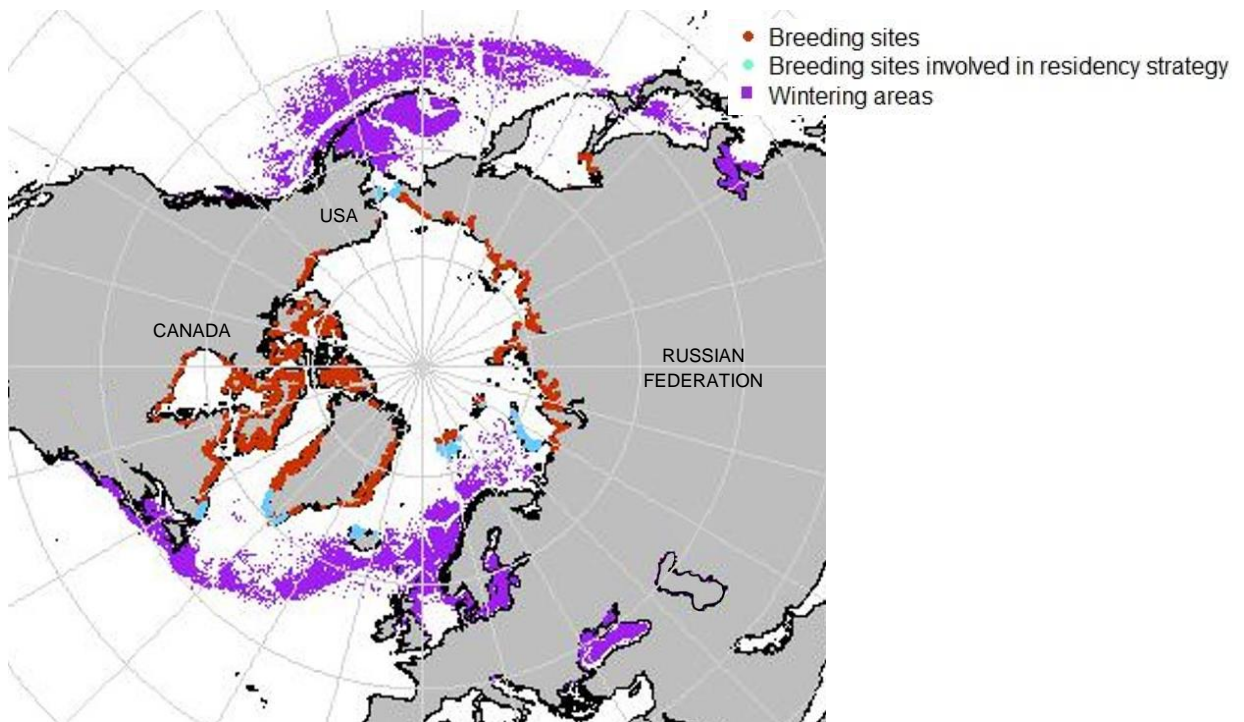

Supplement: 41598_2019_54228_MOESM1_ESM.pdf [file 41598_2019_54228_MOESM1_ESM.pdf]
